# Supplementary material for: Determination of the Protein-Protein Interactions within Acyl Carrier Protein (MmcB)-Dependent Modifications in the Biosynthesis of Mitomycin
Source: MDPI journal article supplement (doi:10.3390/molecules26226791), 2021-11-10
Supplement: s1 [file s1]

# **Determination of the Protein-Protein Interactions Within Acyl Carrier Protein (MmcB) Dependent Modifications in the Biosynthesis of Mitomycin**

**Dongjin Leng<sup>1</sup>, Yong Sheng<sup>1</sup>, Hengyu Wang<sup>1</sup>, Jianhua Wei<sup>1</sup>, Yixin Ou<sup>1</sup>, Zixin Deng<sup>1</sup>,  
Linquan Bai<sup>1</sup> and Qianjin Kang<sup>1,\*</sup>**

1 State Key Laboratory of Microbial Metabolism, Joint International Research Laboratory of Metabolic & Developmental Sciences, and School of Life Sciences & Biotechnology, Shanghai Jiao Tong University, Shanghai 200240, China; dongjinleng@163.com (D.L.); John.Sheng@sjtu.edu.cn (Y.S.); wanghengyu0203@163.com (H.W.); weijianhua@sjtu.edu.cn (J.W.); yixinou@sjtu.edu.cn (Y.O.); zxdeng@sjtu.edu.cn (Z.D.); bailq@sjtu.edu.cn (L.B.)

\* Correspondence: qjkang@sjtu.edu.cn (Q.K); Tel./Fax: +86-21-3420-6119

## Supplementary Tables

Table S1. Strains and plasmids used in this study

| Strains and plasmids            | Description                                            | Source or reference |
|---------------------------------|--------------------------------------------------------|---------------------|
| <i>Streptomyces</i> sp.         |                                                        |                     |
| Strain NRRL 2564                | Wild-type producer for mitomycin C                     | [1]                 |
| DJ01                            | Gene <i>mitE</i> -inactivation mutant                  | This work           |
| DJ01:: <i>mitE</i>              | DJ01 complemented with cloned <i>mitE</i>              | This work           |
| DJ03                            | Gene <i>mmcB</i> -inactivation mutant                  | This work           |
| DJ03:: <i>mmcB</i>              | DJ03 complemented with cloned <i>mmcB</i>              | This work           |
| DJ03:: <i>mmcB</i> (S43A)       | DJ03 complemented with cloned <i>mmcB</i> (S43A)       | This work           |
| DJ05                            | Gene <i>mitB</i> -inactivation mutant                  | This work           |
| DJ05:: <i>mitB</i> (originated) | DJ05 complemented with cloned <i>mitB</i> (originated) | This work           |
| DJ07:: <i>mitB</i> (updated)    | DJ05 complemented with cloned <i>mitB</i> (updated)    | This work           |
| DJ08                            | Gene <i>mitF</i> -inactivation mutant                  | This work           |
| DJ08:: <i>mitF</i>              | DJ08 complemented with cloned <i>mitF</i>              | This work           |
| <i>Escherichia coli</i>         |                                                        |                     |
| <i>E. coli</i> DH10B            | Cloning host                                           | Invitrogen          |
| <i>E. coli</i> ET12567/pUZ8002  | Conjugation donor strain                               | [2]                 |
| <i>E. coli</i> BL21 (DE3)       | Protein expression strain                              | Invitrogen          |

---

|                                |                                                                               |            |
|--------------------------------|-------------------------------------------------------------------------------|------------|
| <i>E. coli</i> BL21(DE3)/pSV20 | Protein expression strain containing of <i>sfp</i>                            | [3]        |
| Plasmids                       |                                                                               |            |
| pBluescript SK (+)             | <i>ColE</i> , <i>lacZ</i> , <i>bla</i> , <i>oriF</i>                          | Stratagene |
| pJTU1278                       | <i>rep pIJ101</i> , <i>tsr</i> , <i>bla</i> , <i>oriT</i>                     | [4]        |
| pSET152                        | $\Phi$ C31, <i>oriT</i> , <i>kasO</i> <sup>*</sup> <i>p</i> , <i>acc(3)IV</i> | [5]        |
| pET28a                         | <i>kan</i> , <i>P</i> <sub>T7</sub> , His <sub>6</sub> -tag                   | Novagen    |
| pJQK401                        | Construct for <i>mitE</i> deletion                                            | This work  |
| pJQK402                        | pSET152 with cloned <i>mitE</i>                                               | This work  |
| pJQK406                        | pET28a with cloned <i>mitE</i>                                                | This work  |
| pJQK408                        | pSET152 with cloned <i>mitB</i> (originated)                                  | This work  |
| pJQK409                        | pSET152 with cloned <i>mitB</i> (updated)                                     | This work  |
| pJQK411                        | pET28a with cloned <i>mitB</i> (updated)                                      | This work  |
| pJQK412                        | Construct for <i>mitF</i> deletion                                            | This work  |
| pJQK413                        | pSET152 with cloned <i>mitF</i>                                               | This work  |
| pJQK414                        | pET28a with cloned <i>mitF</i>                                                | This work  |
| pJQK415                        | pET28a-TEV with cloned <i>mmcB</i>                                            | This work  |
| pJQK416                        | pET28a-TEV with cloned <i>mitB</i>                                            | This work  |

---

**Table S2.** Primers used in this study

| Primers         | Sequences (5'→3')                                                         |
|-----------------|---------------------------------------------------------------------------|
| mitE-petF       | ATAC <u>CATATG</u> ACTGAACAGGCGACCGGTC, <i>NdeI</i> site underlined       |
| mitE-petR       | ATAGAATTCATGAACCGGCCTCCTTGGC, <i>EcoRI</i> site underlined                |
| mitB-petF       | ATA <u>CATATG</u> CGGGCCCCCAACGGCACC, <i>NdeI</i> site underlined         |
| mitB-petR       | ATAGAATTCATCGCGCCGCGTCCCGTGC, <i>EcoRI</i> site underlined                |
| mmcB-petF       | ATAC <u>CATATG</u> GAGACCCTGACGACCGA, <i>NdeI</i> site underlined         |
| mmcB-petR       | ATAGCGGCGGCTCATTGGCGGGTGCGGT, <i>NotI</i> site underlined                 |
| mitB-left armF  | ACGGGATCC <u>CAGGACCGAAAGGCTGCTCAATG</u> , <i>BamHI</i> site underlined   |
| mitB-left armR  | ATGAAGCTT <u>CAGGACGTCGTCGTCGAGGAAGA</u> , <i>HindIII</i> site underlined |
| mitE-left armF  | AAAGGTACCCCACTCATGTCCCGTAGCACCC, <i>KpnI</i> site underlined              |
| mitE-left armR  | AAGAAGCTT <u>TGGTCAACGTCAGGCGGAGGC</u> , <i>HindIII</i> site underlined   |
| mmcB-left armF  | ACGGGATCC <u>GCGGTCACGGGATCTATCA</u> , <i>BamHI</i> site underlined       |
| mmcB-left armR  | GGGAAGCTT <u>TGAGGGAATCGACGAGCACCTT</u> , <i>HindIII</i> site underlined  |
| mitB-right armF | CCCAAGCTT <u>CACCACCGCAACCTCACGCACT</u> , <i>HindIII</i> site underlined  |

|                 |                                                                          |
|-----------------|--------------------------------------------------------------------------|
| mitB-right armR | <u>CCGGTACCCGACCTTCTCGTGCAGGCTCCC</u> , <i>KpnI</i> site underlined      |
| mitE-right armF | <u>CCCAAGCTTCTGGTCGACGACGTCTTCCTGC</u> , <i>HindIII</i> site underlined  |
| mitE-right armR | <u>GCGGATCCAGCCCGACACTGCGCACGGT</u> , <i>BamHI</i> site underlined       |
| mmcB-right armF | <u>CCCAAGCTTATCGACAGTCTCGACCTCCTCGC</u> , <i>HindIII</i> site underlined |
| mmcB-pdF        | <u>CAGCATATGGAAACCCTGACCACCGA</u> , <i>NdeI</i> site underlined          |
| mmcB-pdR        | <u>CTCGAATTCATTCCGCCGGTGCGGTAACG</u> , <i>EcoRI</i> site underlined      |
| mitB-pdF        | <u>CAGCATATGCGGGCCCCAACGGCA</u> , <i>NdeI</i> site underlined            |
| mitB-pdR        | <u>CTCGAATTCATCGCGCCGCGTCCCGTGCCGGT</u> , <i>EcoRI</i> site underlined   |
| mitF -petF      | <u>CCCATATGAGCACCGTCACCGACCGG</u> , <i>NdeI</i> site underlined          |
| <hr/>           |                                                                          |
| mitF -petR      | CG <u>GAATTC</u> TCAGAAGCGGGCACCACCG, <i>EcoRI</i> site underlined       |
| <hr/>           |                                                                          |

## Supplementary Figures

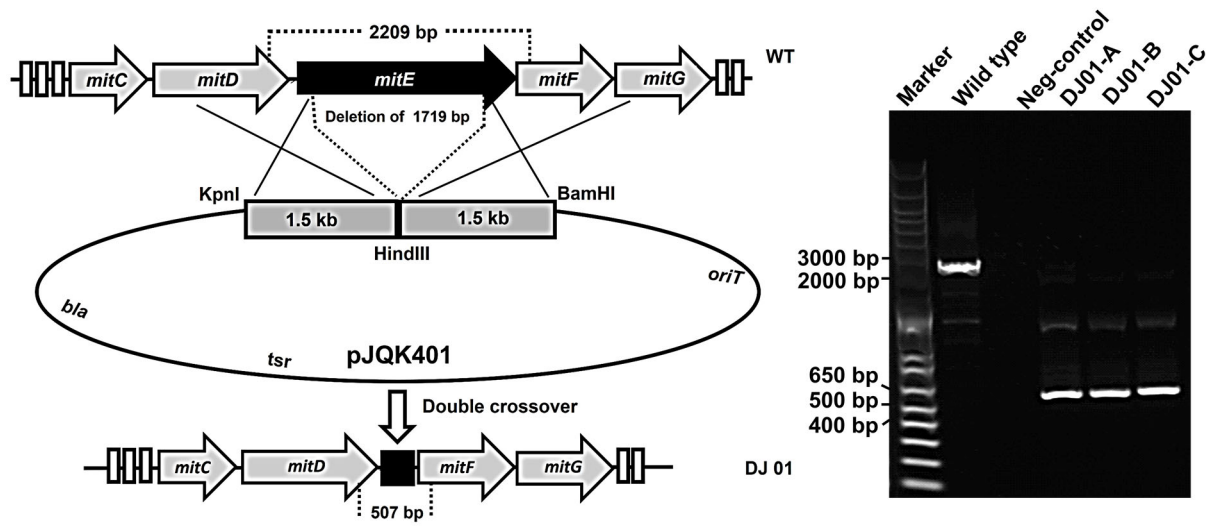

**Figure S1.** The construction of DJ01 mutant. (A). Schematic representation of the in-frame deletion of *mitE*, a 1,719-bp region of *mitE* was deleted through double crossover. (B). Confirmation of the mutant DJ01 through PCR amplification. An approximately 500-bp product was amplified for the DJ01, while a 2,200-bp fragment was obtained from the wild type with the no template-added reaction as the negative control.

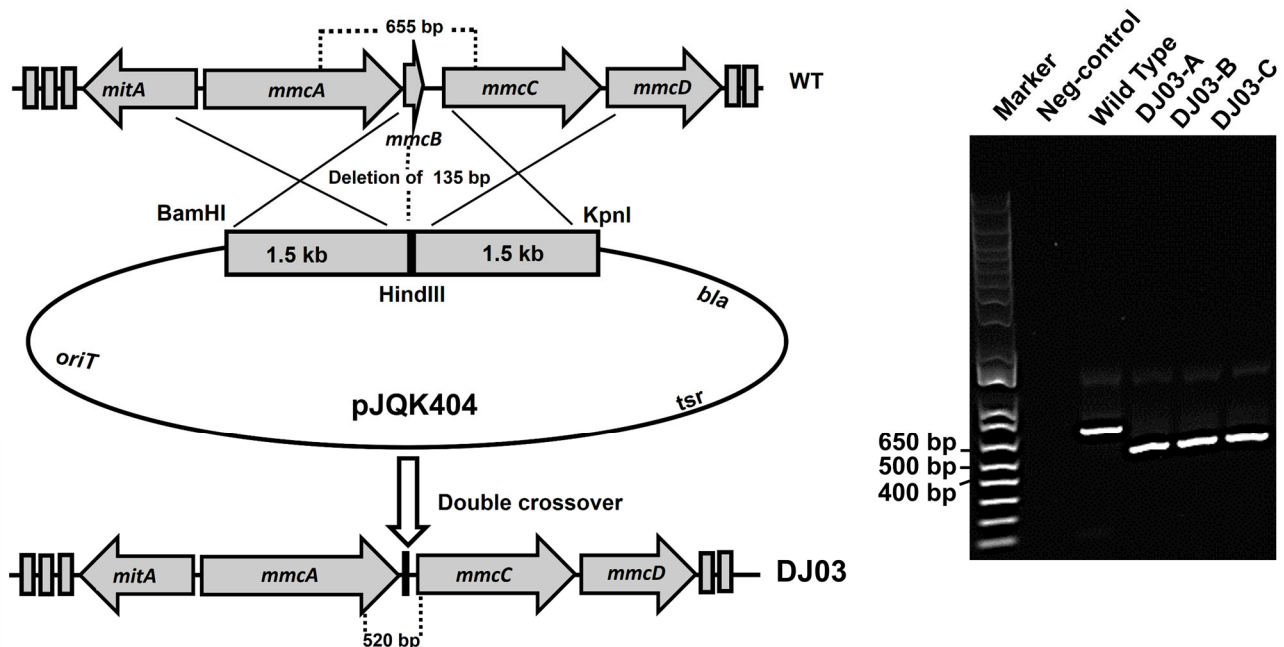

**Figure S2.** The construction of DJ03 mutant. (A). Schematic representation of the in-frame deletion of *mmcB*, a 135-bp region of *mmcB* was deleted through double crossover. (B). Confirmation of the mutant DJ03 through PCR amplification. An approximately 520-bp product was amplified for DJ03, while a 650-bp product was obtained from the wild type with the no template-added reaction as the negative control.

[illegible]

**Figure S3.** Determination of the active site of MmcB. (A) Sequence alignment of MmcB with the homologies, (B) HPLC analysis results of *mmcB* and *mmcB* S43A complementation experiments revealed the active site of Ser 43 residue.

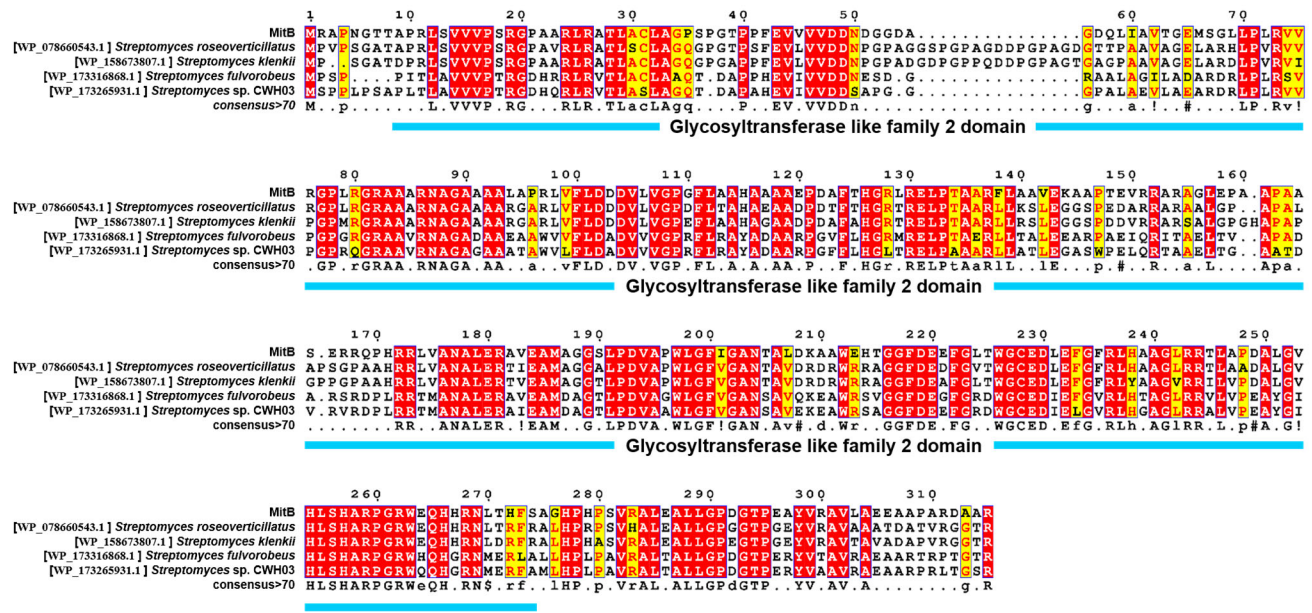

**Figure S4.** The sequence alignment of MitB with its homologies. The targeted family 2 glycosyltransferases including of WP\_078660543.1 from *Streptomyces roseoverticillatus*, WP\_158673807.1 from *Streptomyces klenkii*, WP\_173316868.1 from *Streptomyces fulvorobeus*, and WP\_173265931.1 from *Streptomyces sp. CWH03*.

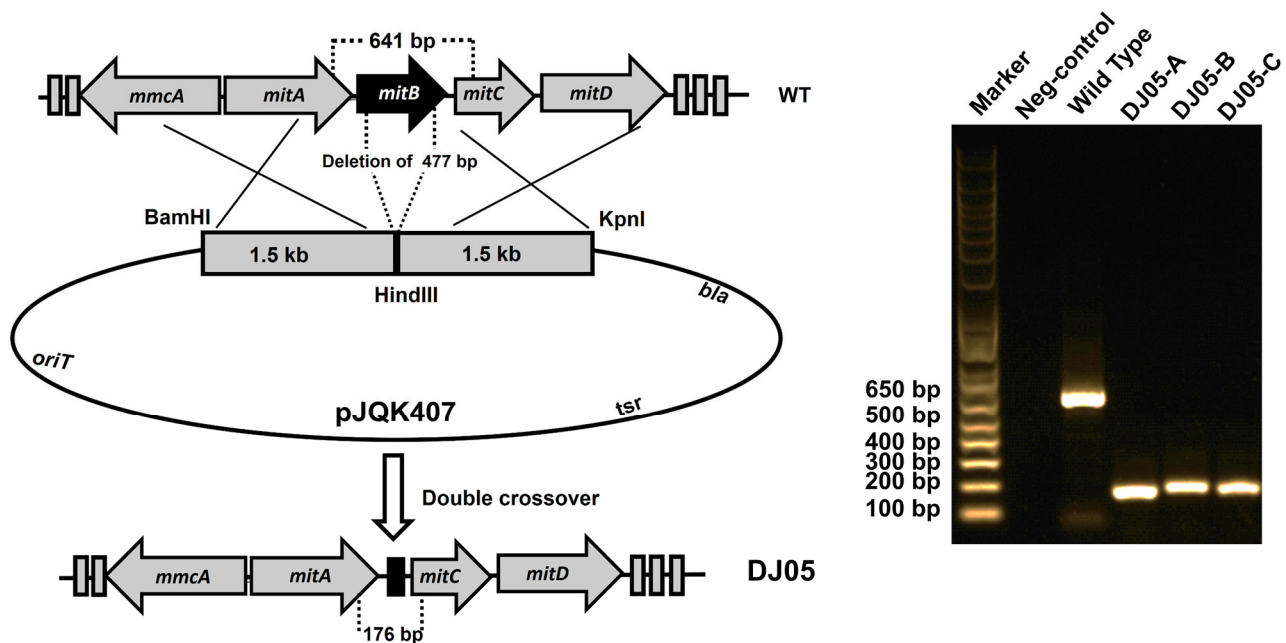

**Figure S5.** The construction of DJ05 mutant. (A). Schematic representation of the in-frame deletion of *mitB*, a 477-bp region of *mitB* was deleted through double crossover. (B). Confirmation of the mutant DJ05 through PCR amplification. An approximately 170-bp product was amplified for DJ03, while a 640-bp product was obtained from the wild type with the no template-added reaction as the negative control.



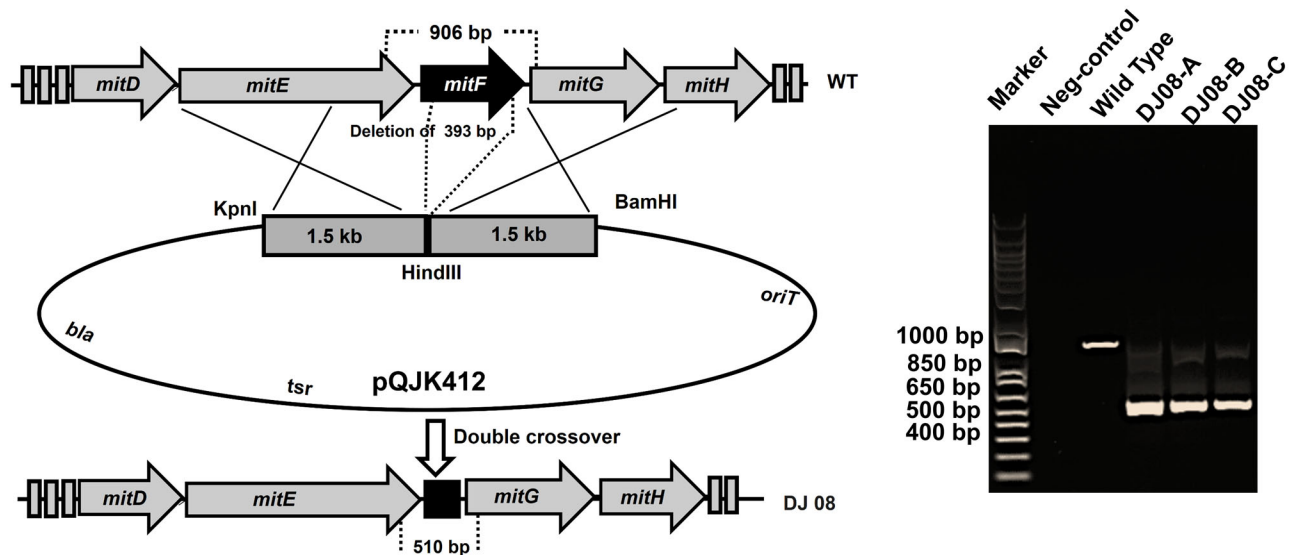

**Figure S6.** The construction of DJ08 mutant. (A). Schematic representation of the in-frame deletion of *mitF*, a 393-bp region of *mitF* was deleted through double crossover. (B). Confirmation of the mutant DJ08 through PCR amplification. An approximately 510-bp product was amplified for DJ03, while a 906-bp product was obtained from the wild type with the no template-added reaction as the negative control.

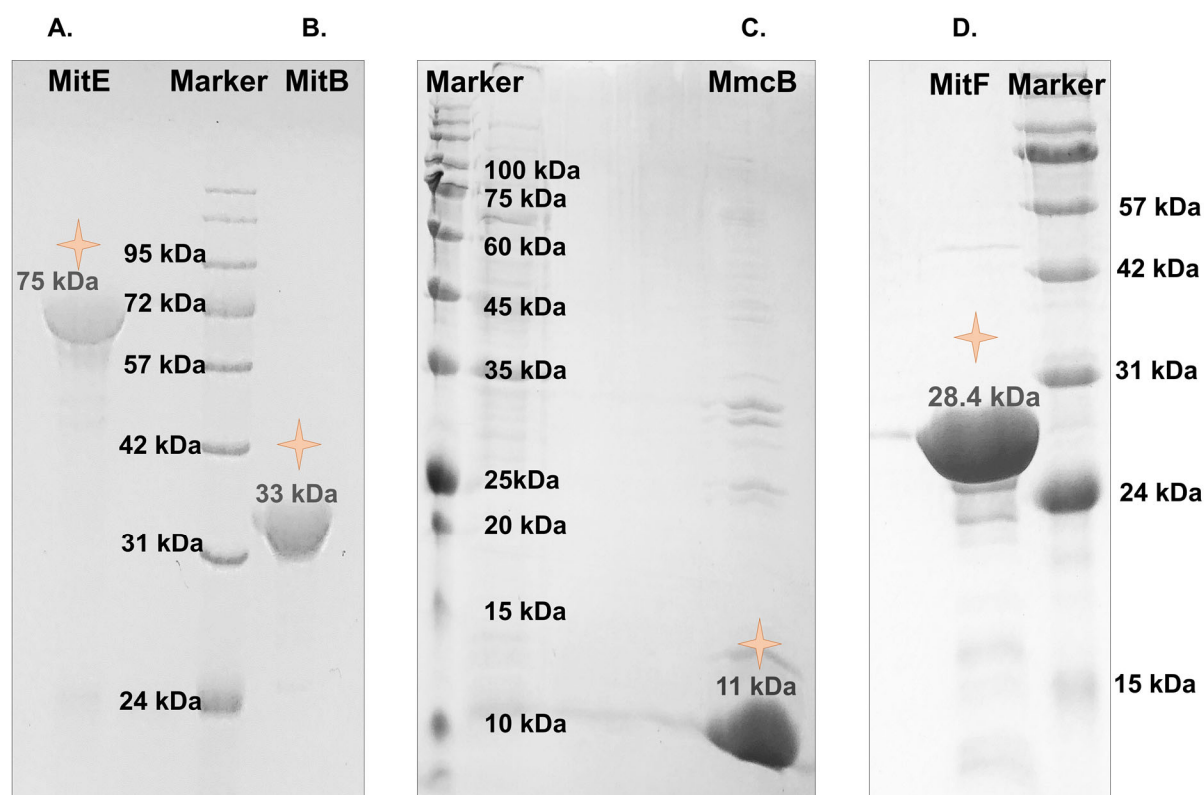

**Figure S7.** SDS-PAGE analysis of the purified MitE (A), MitB (B), MmcB (C) and MitF (D) expressed in *E. coli* BL21(DE3)

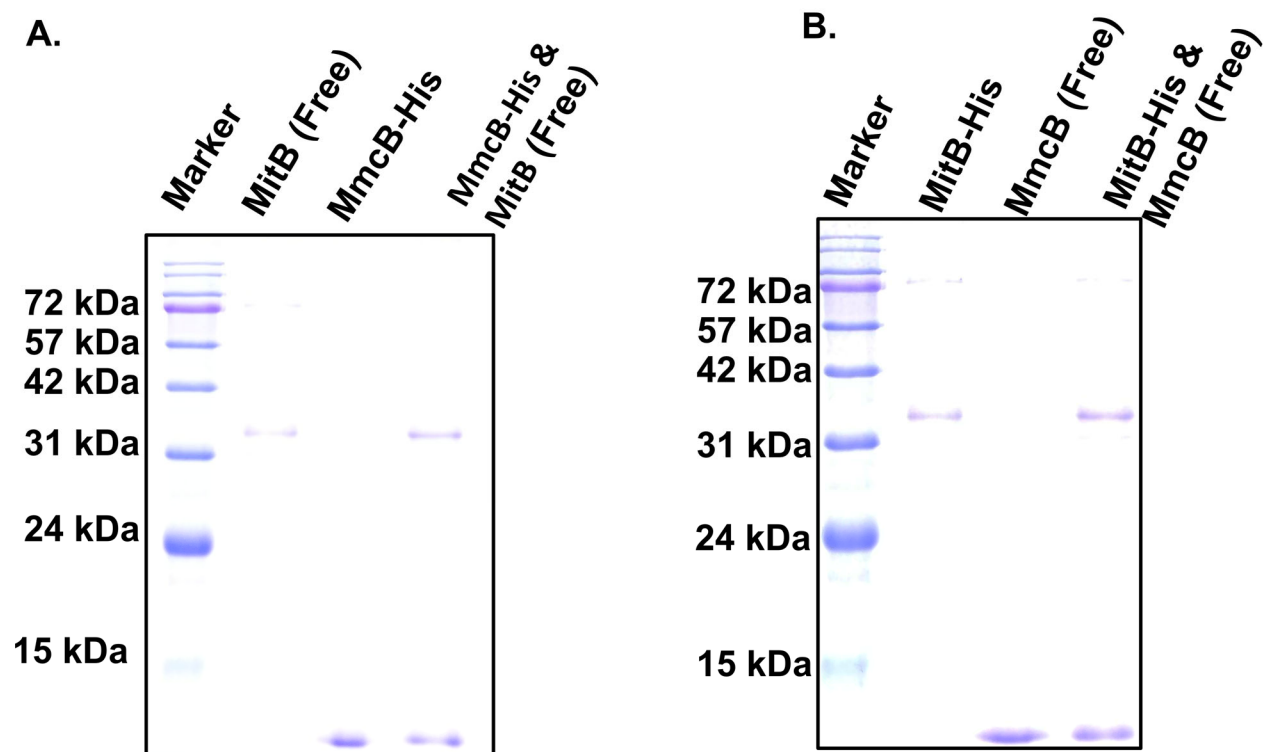

Figure S8. The *in vivo* pull-down assay between MmcB and MitB

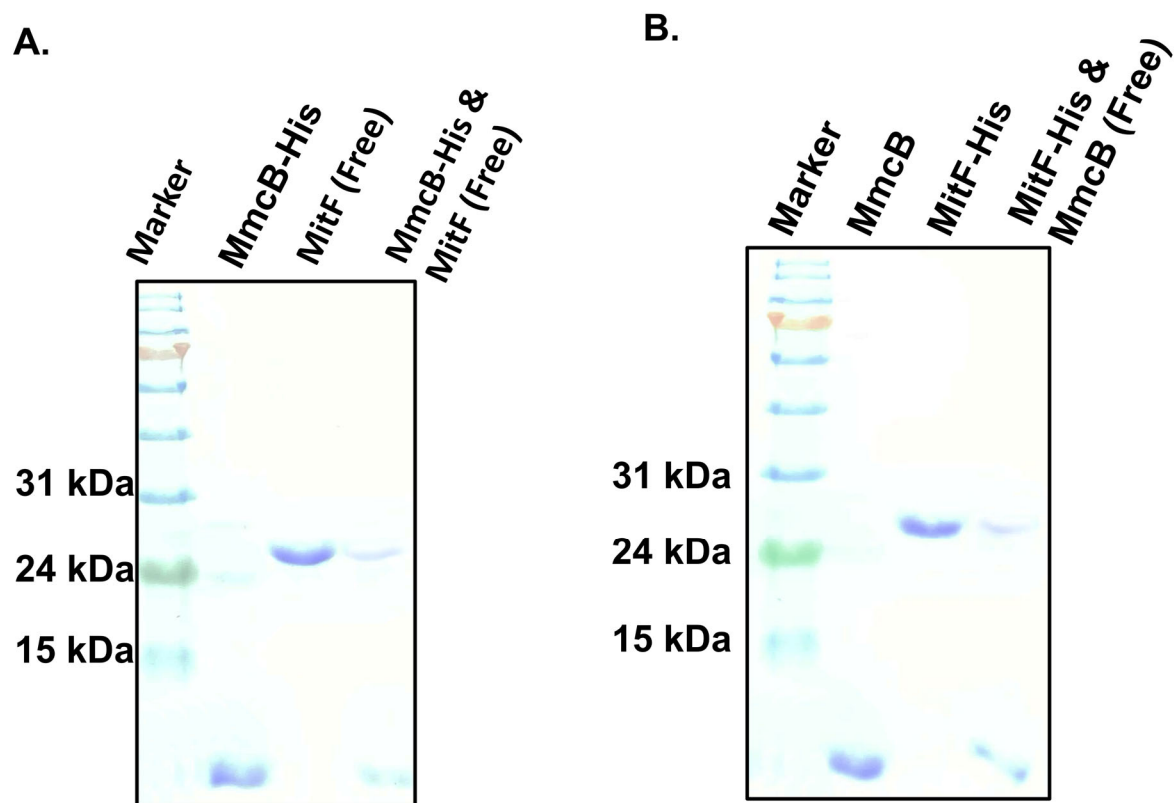

Figure S9. The *in vivo* pull-down assay between MmcB and MitF

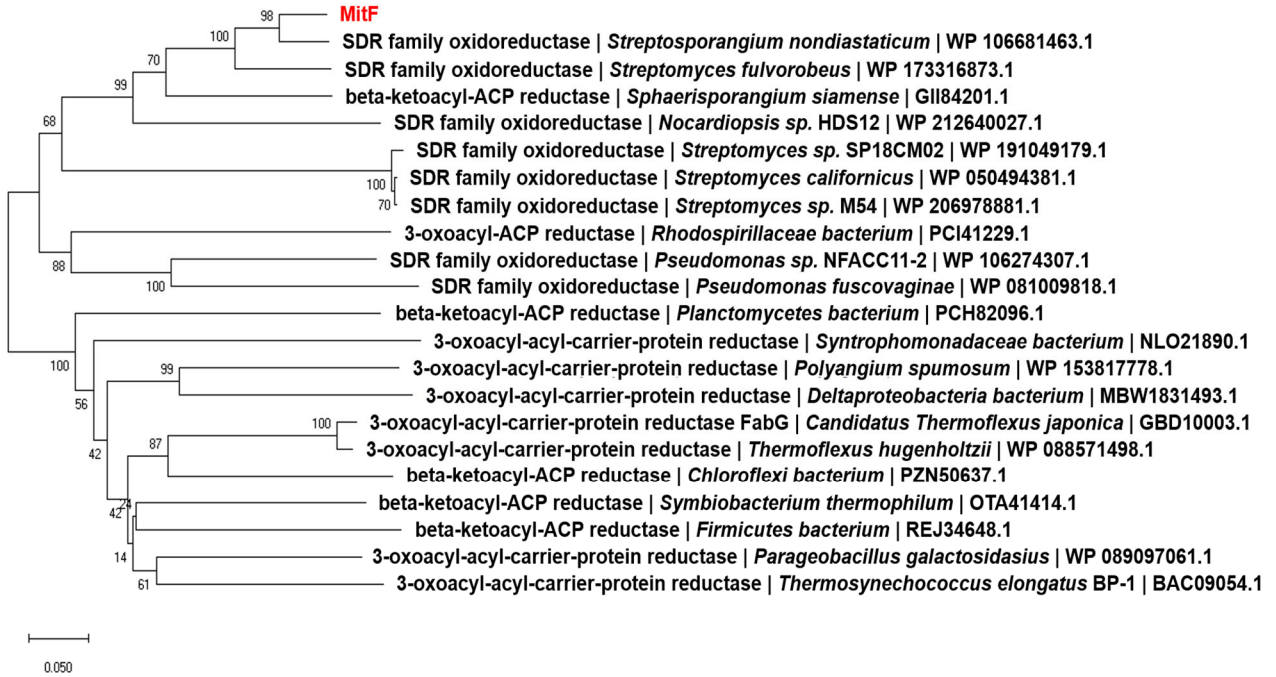

**Figure S10.** Phylogenetic analysis of MitF with its homologous. The analysis was performed in MEGA 11 software. The amino acid sequences alignment of MitF and homologs were conducted by using ClustalW, and then phylogenetic analyses were further proceeding by the neighbor-joining method. The parameters of phylogeny were set as follows: bootstrap test (1000 replicates),  $p$ -distance mode, and complete deletion. The numbers adjacent to branches represent bootstrap values.

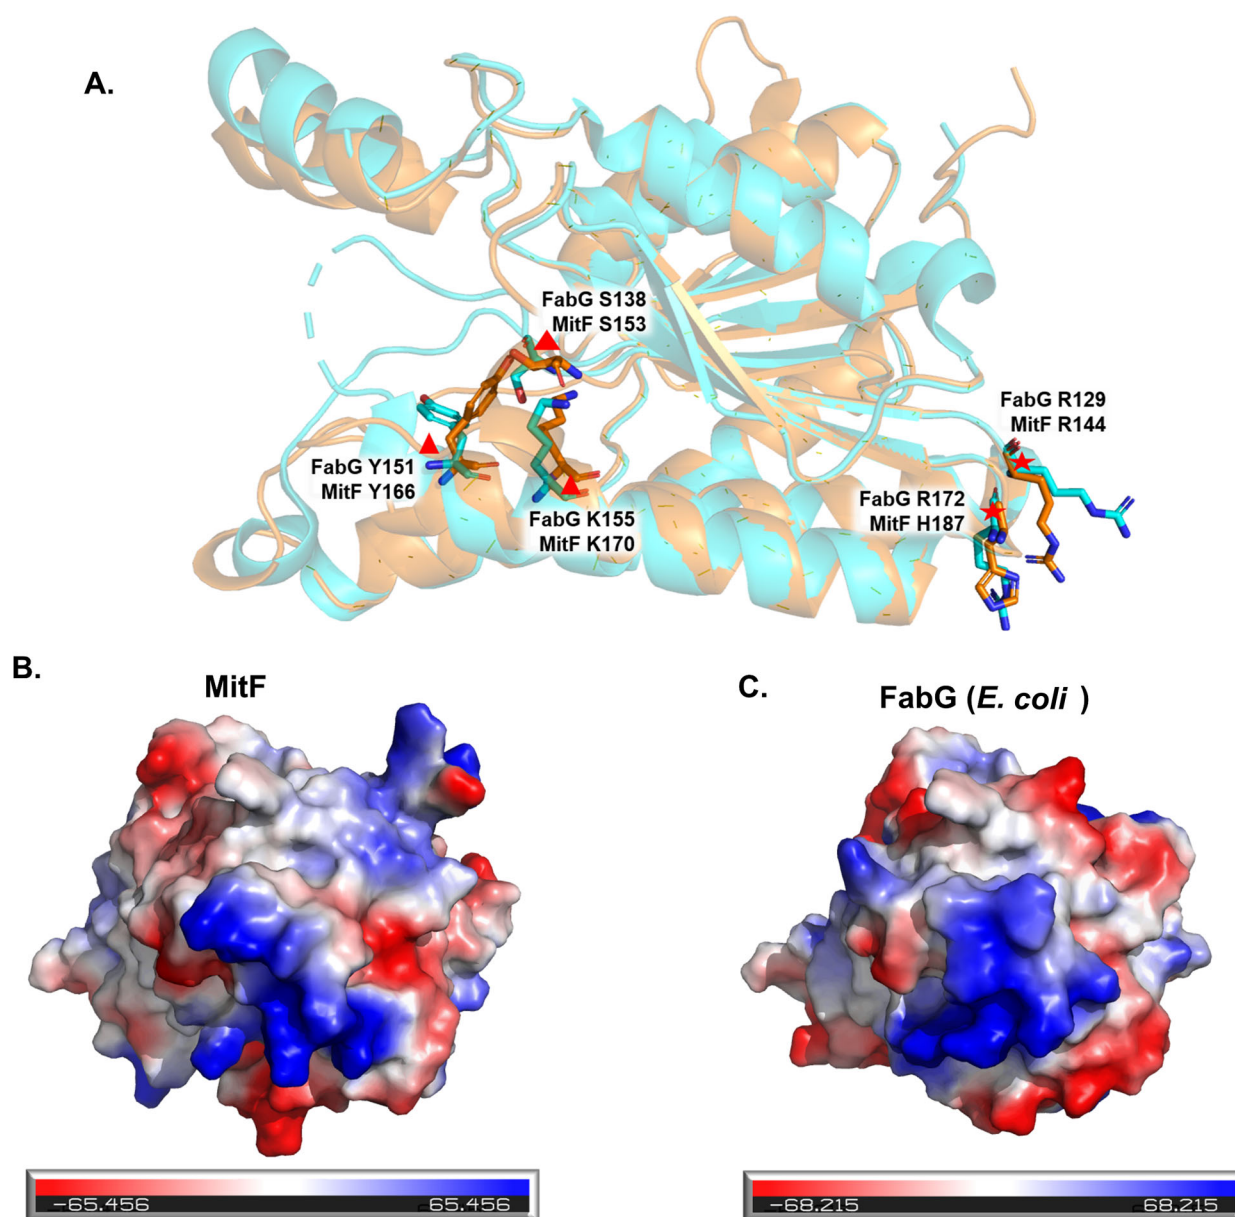

**Figure S11.** The models of MitF with the FabG (PDB: 1Q7B) by SWISS-MODEL server. (A) The superimposition of the MitF with FabG revealed the conserved activity center, (B) Characteristic electron cloud map of the MitF, (C) Characteristic electron cloud map of the FabG.

## References

1. Mao, Y.; Varoglu, M.; and Sherman, D.H. Molecular characterization and analysis of the biosynthetic gene cluster for the antitumor antibiotic mitomycin C from *Streptomyces lavendulae* NRRL 2564. *Chem. Biol.*, **1999**, *6*, 251-63.
2. Paget, M.S.; Chamberlin, L.; Atrih, A.; Foster, S. J.; Buttner, M. J. Evidence that the extracytoplasmic function sigma factor *sigmaE* is required for normal cell wall structure in *Streptomyces coelicolor* A3(2). *J. Bacteriol.*, **1999**, *181*, 204-11.
3. Zhang, D.; Zhang, F.; and Liu, W. A KAS-III heterodimer in lipstatin biosynthesis nondecarboxylatively condenses C(8) and C(14) fatty acyl-coa substrates by a variable mechanism during the establishment of a C(22) aliphatic skeleton. *J. Am. Chem. Soc.*, **2019**, *141*, 3993-4001.
4. He, Y.; Wang, Z.; Bai, L.; Liang, J.; Zhou, X.; Deng, Z. Two pHZ1358-derivative vectors for efficient gene knockout in streptomyces. *J. Microbiol. Biotechnol.* **2010**, *20*, 678-82.
5. Bierman, M.; Logan, R.; O'Brien, K.; Seno, E. T.; Rao, R. N.; Schoner, B. E. Plasmid cloning vectors for the conjugal transfer of DNA from *Escherichia coli* to *Streptomyces* spp. *Gene*. **1992**, *116*, 43-49.
